# Supplementary material
Source: PubMed Central journal article supplement (PMC3003126)
Supplement: 1006981107_pnas.201006981SI.pdf [file 1006981107_pnas.201006981SI.pdf]

# Supporting Information

Paulsson et al. 10.1073/pnas.1006981107

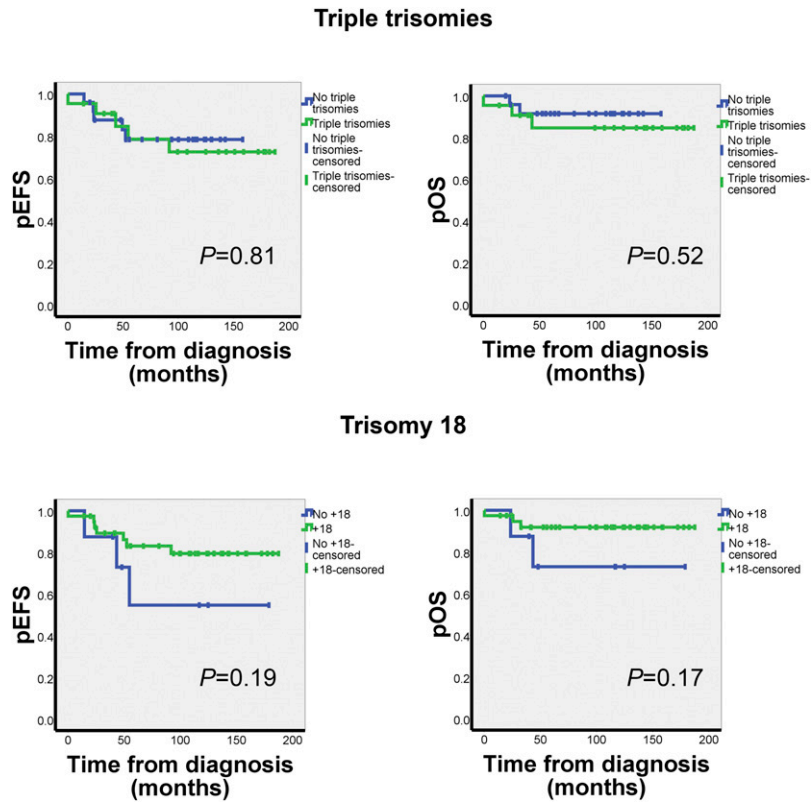

Fig. S1. Event-free and overall survival of 47 high hyperdiploid childhood acute lymphoblastic leukemia cases, treated according to the Nordic Society of Pediatric Hematology (NOPHO) 1992/2000 protocols, with and without the “triple trisomies” (i.e., concurrent +4, +10, and +17) and trisomy 18, respectively. There were no statistically significant differences in survival between the groups. pEFS, probability of event-free survival; pOS, probability of overall survival.

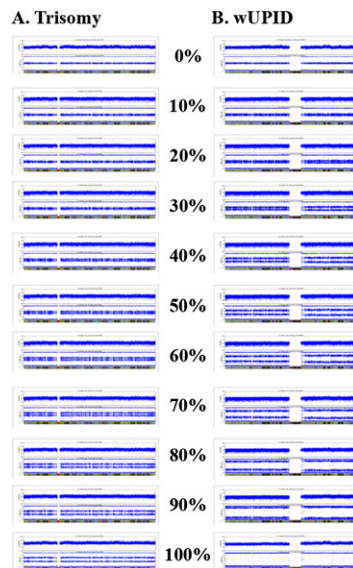

**Fig. S2.** To determine the extent to which subclonal trisomies and whole-chromosome uniparental isodisomies (UPIDs) were detectable by the Illumina system, a dilution series was made of a sample known to have such aberrations in 100% of the leukemic cells mixed with the corresponding remission sample in the concentrations of 10%, 20%, 30%, 40%, 50%, 60%, 70%, 80%, and 90%, and was subjected to SNP array analysis. Top panels show log<sub>2</sub> ratios along the chromosomes. Each dot represents the log<sub>2</sub> ratio of one marker. A log<sub>2</sub> ratio of zero corresponds to a normal, diploid copy number. Increased and decreased log<sub>2</sub> ratios correspond to gained and deleted regions, respectively. Lower panels show B allele frequencies (BAFs), which are calculated as (signal intensity for allele B)/(signal intensities for allele A + allele B). Homozygous SNPs have a value of 0 or 1, and heterozygous SNPs a value of 0.5 in a diploid chromosome segment. (A) Trisomy. When the extra chromosome is present in 100% of the cells, SNPs display an average log<sub>2</sub> ratio >0.5 and BAF values of 0, ~0.33, ~0.67, and 1.0, where the middle values correspond to the heterozygous SNPs. The trisomy was detectable when it was present in 20% or more of the cells. (B) Whole-chromosome UPID. When the UPID is present in 100% of the cells, SNPs display a normal diploid log<sub>2</sub> ratio of zero and BAF values of 0 and 1, corresponding to loss of heterozygosity. The UPID was detectable when it was present in 10% or more of the cells. The panels were extracted from the BeadStudio 3.1.2.0 software with Illumina Genome Viewer 3.2.9.

## Other Supporting Information Files

[Table S1 \(DOC\)](#)

[Table S2 \(DOC\)](#)

[Table S3 \(DOC\)](#)

[Table S4 \(DOC\)](#)

[Table S5 \(DOC\)](#)
